# Supplementary material for: Genome-Wide Association Study Reveals Key SNP Markers for Agro-Physiological Traits in Bread Wheat (Triticum aestivum L.)
Source: Research Square preprint supplement (doi:10.21203/rs.3.rs-7424201/v1), 2025-10-06

**Supplementary Fig. S1**

Fig. S1 Circular Manhattan plots display SNPs significantly associated with traits. The plots feature concentric circles representing the association analyses conducted using the mixed linear model (MLM), general linear model (GLM), and fixed and random effects model for circulating probability unification (FarmCPU) methods. Each dot corresponds to an SNP, with its radial distance from the center reflecting its p-value. Red dotted lines indicate the Bonferroni correction threshold at p < 0.05. The outermost heatmap ring shows SNP density across chromosomes, with colors ranging from green (low density) to red (high density). Chromosomes are labeled around the outer circle. The p-values in −log10 scale are represented by black vertical lines. The chart on the right shows quantile-quantile (QQ) plots of observed versus expected p-values based on the MLM, GLM, and FarmCPU methods.


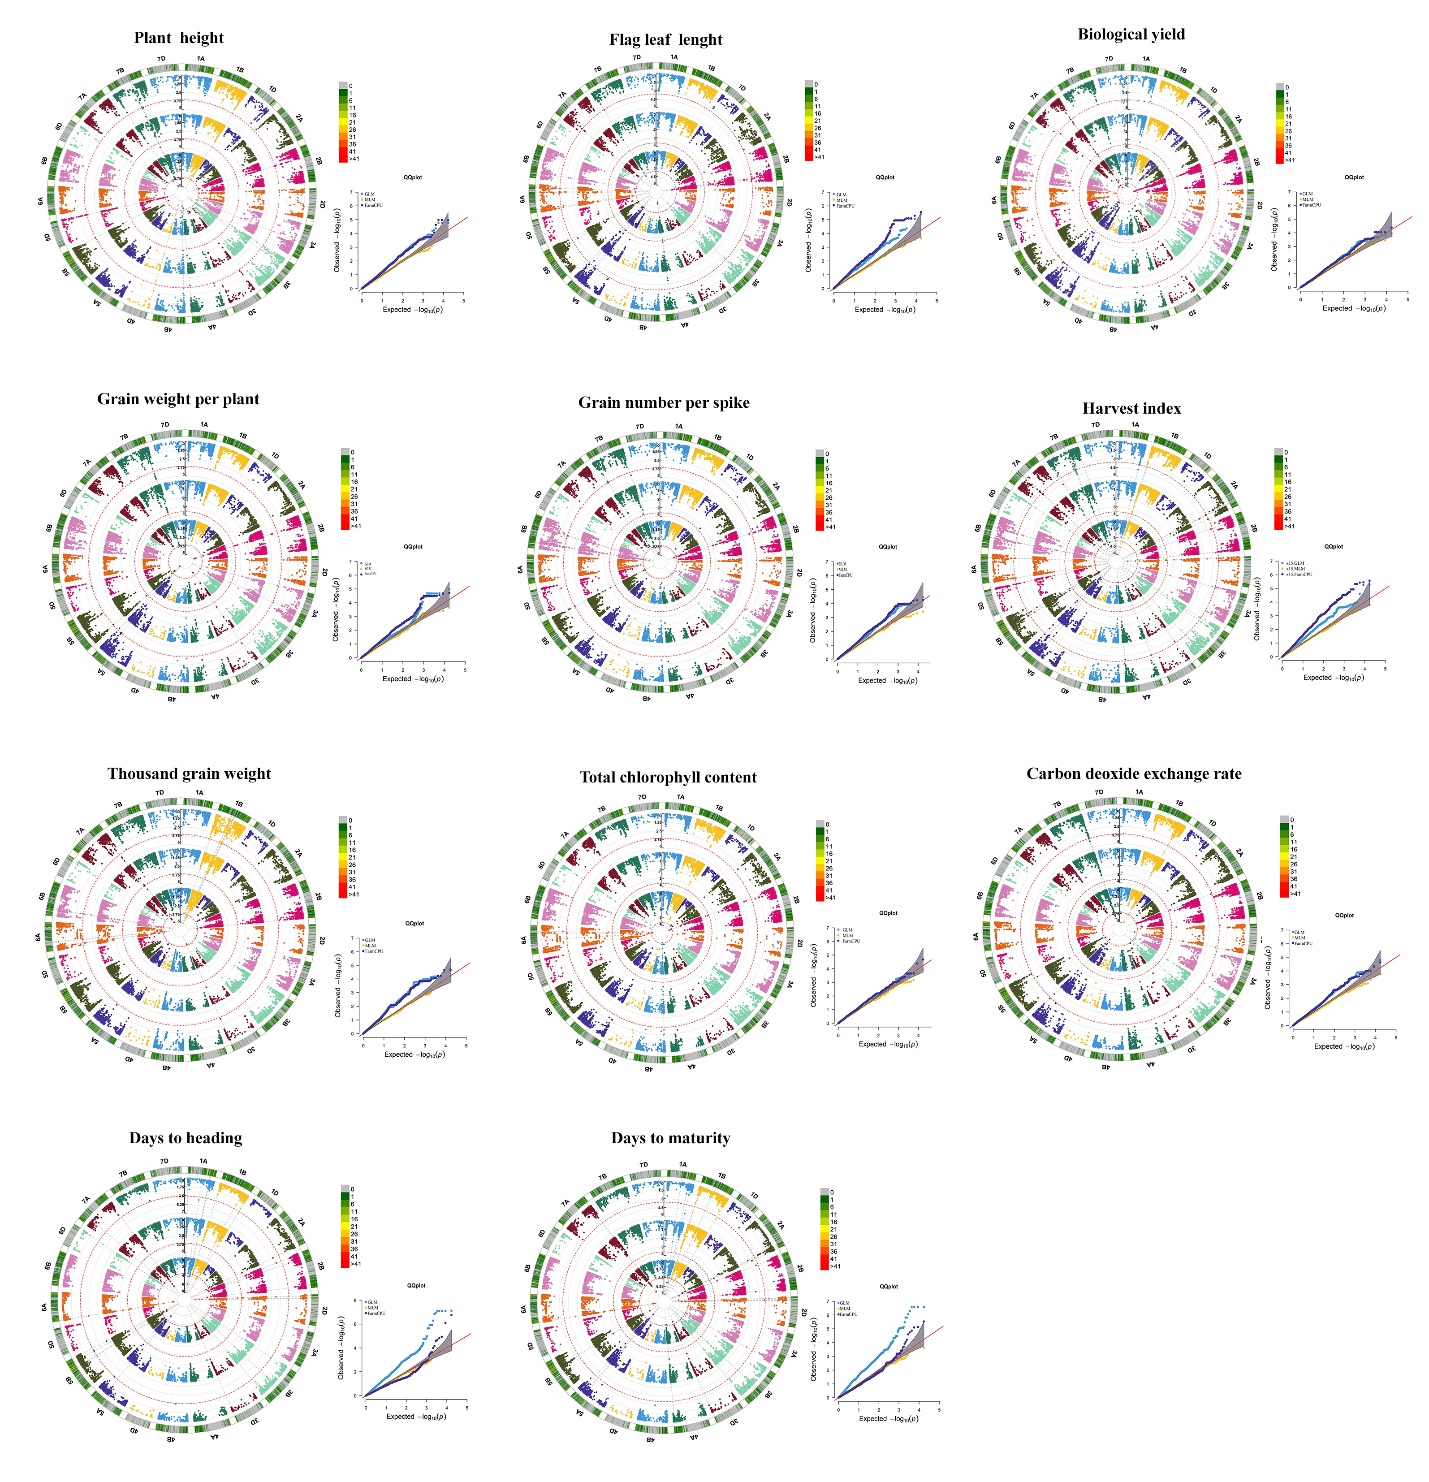

Supplement: Supplementary file 2 [file c1104ba84abf1ada84196fe6.docx]
